# Supplementary material for: Dissecting Genome-Wide Association Signals for Loss-of-Function Phenotypes in Sorghum Flavonoid Pigmentation Traits
Source: PubMed Central journal article supplement (PMC3815067; doi:10.1534/g3.113.008417), 2013-11-01
Supplement: supp_g3.113.008417_FigureS4.pdf [file supp_g3.113.008417_FigureS4.pdf]

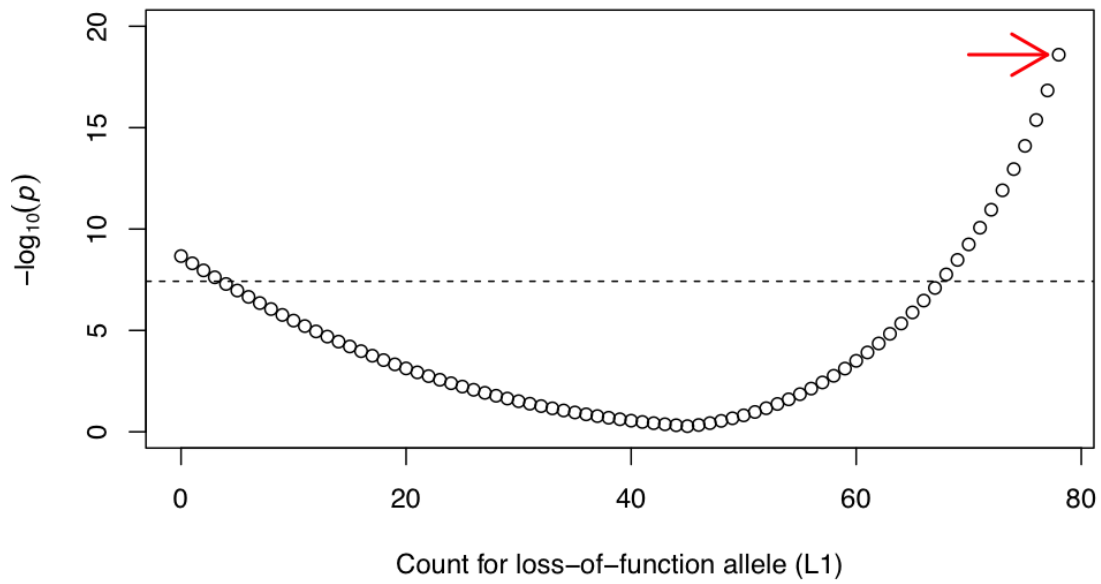

**Figure S4 Distribution of test statistic for the loss-of-function genome scan.** Plotted are the negative  $\log_{10}$   $P$ -values for every  $2 \times 2$  contingency table with the same marginal frequencies as the observed contingency table for the *tan1-a* allele (*i.e.* same overall frequencies of phenotypes and genotypes). The dashed line indicates the Bonferroni-corrected  $P$ -value of 0.01 and the red arrow indicates the observed test statistic for the *tan1-a* allele.
