# Supplementary material for: Dissecting Genome-Wide Association Signals for Loss-of-Function Phenotypes in Sorghum Flavonoid Pigmentation Traits
Source: PubMed Central journal article supplement (PMC3815067; doi:10.1534/g3.113.008417), 2013-11-01
Supplement: supp_g3.113.008417_TableS1.pdf [file supp_g3.113.008417_TableS1.pdf]

**Table S1 Summary of flavonoid-related candidate gene families in sorghum.** Known components of the flavonoid network include (1) biosynthetic enzymes that build the polyphenol backbone and produce diverse end products, (2) regulators, particularly a ternary complex of WD40, MYB, and bHLH transcription factors, and (3) transport and polymerization proteins responsible for localization and stabilization of the end products.

| Reference gene name | Reference gene systematic ID | Reference species     | Max. % similarity | Min. % similarity | Number of genes | Functional category | Function of reference gene                |
|---------------------|------------------------------|-----------------------|-------------------|-------------------|-----------------|---------------------|-------------------------------------------|
| TT4                 | AT5G13930                    | <i>A. thaliana</i>    | 91.6              | 12.4              | 44              | Biosynthesis        | Chalcone synthase (CHS)                   |
| TT5                 | AT3G55120                    | <i>A. thaliana</i>    | 56.1              | 35.4              | 2               | Biosynthesis        | Chalcone isomerase (CHI)                  |
| TT6                 | AT3G51240                    | <i>A. thaliana</i>    | 76.8              | 36.9              | 15              | Biosynthesis        | Flavone 3-hydroxylase (F3H)               |
| TT7                 | AT5G07990                    | <i>A. thaliana</i>    | 69.8              | 46.4              | 21              | Biosynthesis        | Flavone 3'-hydroxylase (F3'H)             |
| TT3                 | AT5G42800                    | <i>A. thaliana</i>    | 68.8              | 47.4              | 18              | Biosynthesis        | Dihydroflavonol reductase (DFR)           |
| TT18/TDS4           | AT4G22880                    | <i>A. thaliana</i>    | 63.8              | 43.5              | 12              | Biosynthesis        | Anthocyanidin synthase (ANS/LDOX)         |
| TT15                | AT1G43620                    | <i>A. thaliana</i>    | 68.6              | 9.1               | 5               | Biosynthesis        | UDP-flavonoid glucosyl transferase (UFGT) |
| Banyuls (BAN)       | AT1G61720                    | <i>A. thaliana</i>    | 63.5              | 36.2              | 22              | Biosynthesis        | Anthocyanidin reductase (ANR)             |
| TT10                | AT5G48100                    | <i>A. thaliana</i>    | 61.2              | 55                | 14              | Biosynthesis        | Flavonoid oxidase                         |
| VvLAR1              | GSVIVG01011958001            | <i>Vitis vinifera</i> | 52.9              | 43.9              | 8               | Biosynthesis        | Leucoanthocyanin reductase (LAR)          |
| TT2                 | AT5G35550                    | <i>A. thaliana</i>    | 36.8              | 32.2              | 8               | Regulation          | MYB transcription factor                  |
| TT8                 | AT4G09820                    | <i>A. thaliana</i>    | 56                | 8.5               | 17              | Regulation          | bHLH transcription factor                 |
| TTG1                | AT5G24520                    | <i>A. thaliana</i>    | 73                | 22.3              | 13              | Regulation          | WD40 repeat protein                       |
| TTG2                | AT2G37260                    | <i>A. thaliana</i>    | 35.4              | 12.1              | 12              | Regulation          | WRKY transcription factor                 |
| TT16                | AT5G23260                    | <i>A. thaliana</i>    | 53.6              | 36.5              | 17              | Regulation          | MADS-box transcription factor             |
| TT1                 | AT1G34790                    | <i>A. thaliana</i>    | 46.9              | 22.1              | 22              | Regulation          | Zn-finger transcription factor            |
| TT12                | AT3G59030                    | <i>A. thaliana</i>    | 60.6              | 50.9              | 16              | Transport           | MATE vacuolar transport                   |
| TT19                | AT5G17220                    | <i>A. thaliana</i>    | 60.7              | 28                | 24              | Transport           | Glutathione-S-transferase                 |
| aha10               | AT1G17260                    | <i>A. thaliana</i>    | 82.5              | 28.9              | 20              | Transport           | H <sup>+</sup> -ATPase proton pump        |
| Bronze2 (BZ2)       | GRMZM2G016241                | <i>Zea mays</i>       | 79.5              | 39.8              | 44              | Transport           | Glutathione-S-transferase                 |
| ZmMRP3              | GRMZM2G111903                | <i>Zea mays</i>       | 89.4              | 48.6              | 11              | Transport           | MRP anthocyanin transporter               |
